# Supplementary material for: Galvanic replacement synthesis of multi-branched gold nanocrystals for photothermal cancer therapy
Source: Royal Society of Chemistry journal article supplement (doi:10.1039/d0tb00748j), 2020-01-01
Supplement: d0tb00748j1.pdf [file d0tb00748j1.pdf]

## Supporting Information

### Galvanic Replacement Synthesis of Multi-branched Gold Nanocrystals for Photothermal Cancer Therapy

Dewei Zhu<sup>a§</sup>, Yang Liu<sup>a§</sup>, Maixian Liu<sup>bc</sup>, Xin Liu<sup>a</sup>, Paras N. Prasad<sup>\*de</sup>, and Mark T. Swihart<sup>\*aef</sup>

---

<sup>a</sup> Department of Chemical and Biological Engineering, University at Buffalo, The State University of New York, Buffalo, New York, 14260, USA.

<sup>b</sup> Key Laboratory of Optoelectronic Devices and Systems of Ministry of Education and Guangdong Province, College of Optoelectronic Engineering, Shenzhen University, Shenzhen, Guangdong, 518055, China.

<sup>c</sup> National-Regional Key Technology Engineering Laboratory for Medical Ultrasound, Guangdong Key Laboratory for Biomedical Measurements and Ultrasound Imaging, Department of Biomedical Engineering, School of Medicine, Shenzhen University, Shenzhen, 518055, China.

<sup>d</sup> Department of Chemistry, University at Buffalo, The State University of New York, Buffalo, New York, 14260, USA.

<sup>e</sup> Institute for Lasers, Photonics, and Biophotonics, University at Buffalo, The State University of New York, Buffalo, New York, 14260, USA.

<sup>f</sup> RENEW Institute, University at Buffalo, The State University of New York, Buffalo, New York, 14260, USA.

<sup>§</sup> Address correspondence to Paras N. Prasad, e-mail: pnprasad@buffalo.edu; Mark T. Swihart, e-mail: swihart@buffalo.edu

**This PDF file includes:**

Details of photothermal transduction efficiency calculation

Figures S1 to S10

References

**Photothermal Transduction Efficiency Calculation**

As given by Roper,<sup>1</sup> an energy balance for the system is

$$\sum_i m_i C_{p,i} \frac{dT}{dt} = Q_{NC} + Q_{Dis} - Q_{Surr} \quad (1)$$

where  $m$  and  $C_p$  are the mass and heat capacity of the solvent (water) and  $T$  is the average solution temperature.  $Q_{NC}$  is the photothermal energy input from the nanocrystals, expressed as

$$Q_{NC} = I(1 - 10^{-A_{980}})\eta \quad (2)$$

where  $I$  is the incident laser power,  $A_{980}$  is the optical density of the nanoparticle solution at the laser wavelength of 980 nm (**Fig. 5b**), and  $\eta$  is the photothermal transduction efficiency.  $Q_{Dis}$  is the baseline energy input due to absorbance by the solvent and the sample cell without nanoparticles, which was measured independently to be 135.1 mW.  $Q_{Surr}$  is the heat loss to the surroundings, expressed as

$$Q_{Surr} = hS(T - T_{Surr}) \quad (3)$$

where  $h$  is a heat transfer coefficient,  $S$  is the surface area of the sample, and  $T_{Surr}$  is the ambient temperature of the surroundings. After an initial transient period, the spatially averaged temperature reaches a steady state maximum value,  $T_{Max}$ . At  $T_{Max}$ , the energy input is equal to the energy output and equation (1) and (3) can be written as,

$$Q_{NC} + Q_{Dis} = Q_{Surr-max} = hS(T_{Max} - T_{Surr}) \quad (4)$$

Substituting equation (2) into (4), the photothermal transduction efficiency,  $\eta$ , is given by this model

as

$$\eta = \frac{hS(T_{Max} - T_{Surr}) - Q_{Dis}}{I(1 - 10^{-A_{980}})} \quad (5)$$

In order to obtain  $hS$ , a dimensionless driving force temperature  $\theta$  and a characteristic thermal time constant  $\tau_s$  are introduced as

$$\theta = \frac{T - T_{Surr}}{T_{Max} - T_{Surr}} \quad (6)$$

$$\tau_s = \frac{\sum_i m_i c_{p,i}}{hS} \quad (7)$$

Substituting equations (6) and (7) into (1), we obtain,

$$\frac{d\theta}{dt} = \frac{1}{\tau_s} \left[ \frac{Q_{NC} + Q_{Dis}}{hS(T_{max} - T_{surr})} - \theta \right] \quad (8)$$

For the cooling stage, the laser was shut off, meaning that the input energy is zero. Then equation (8) is simplified as

$$dt = -\tau_s \frac{d\theta}{\theta} \quad (9)$$

After integrating, it gives the expression

$$t = -\tau_s \ln \theta \quad (10)$$

The time constant of the system,  $\tau_s$ , is determined by linear fitting of  $t$  as a function of  $-\ln(\theta)$  (**Fig. S1**).

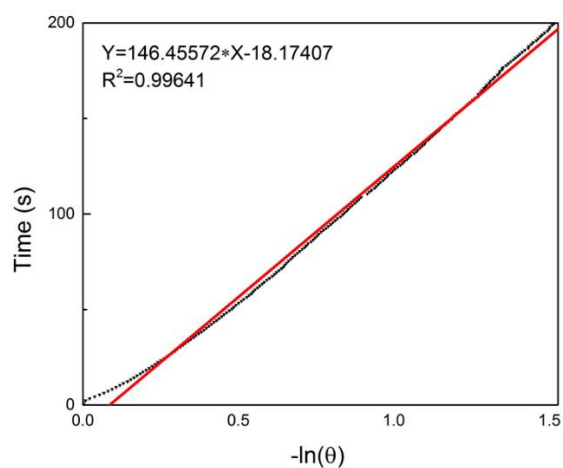

**Figure S1.** Plot of time versus negative natural logarithm of the temperature increment for the cooling cycle (after 10 min heating) for multi-branched Au NCs with concentration of 200  $\mu\text{g/mL}$ . The linear fit of the data points results in a half-life time  $\tau_s$  (slope) as shown in the inset.

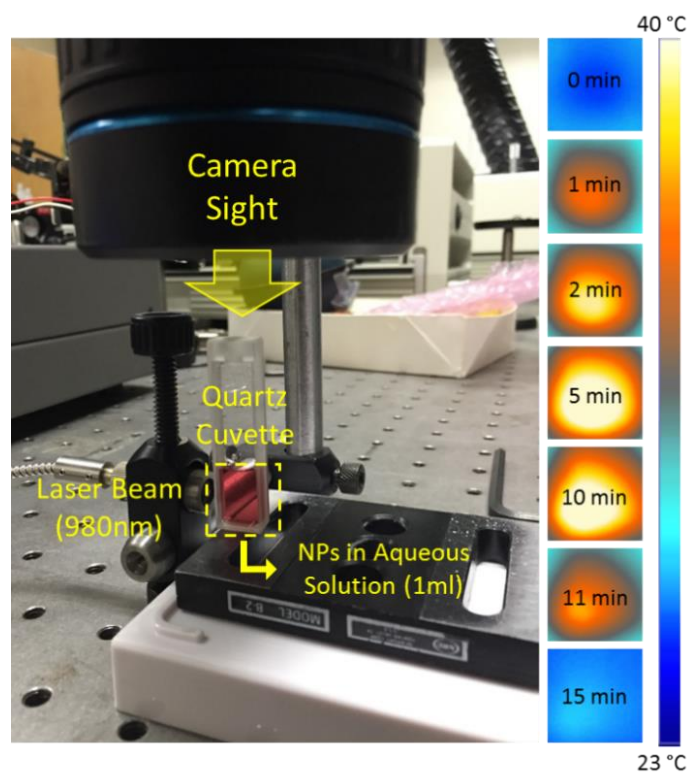

**Figure S2.** Annotated photograph of the system for photothermal heating experiments.

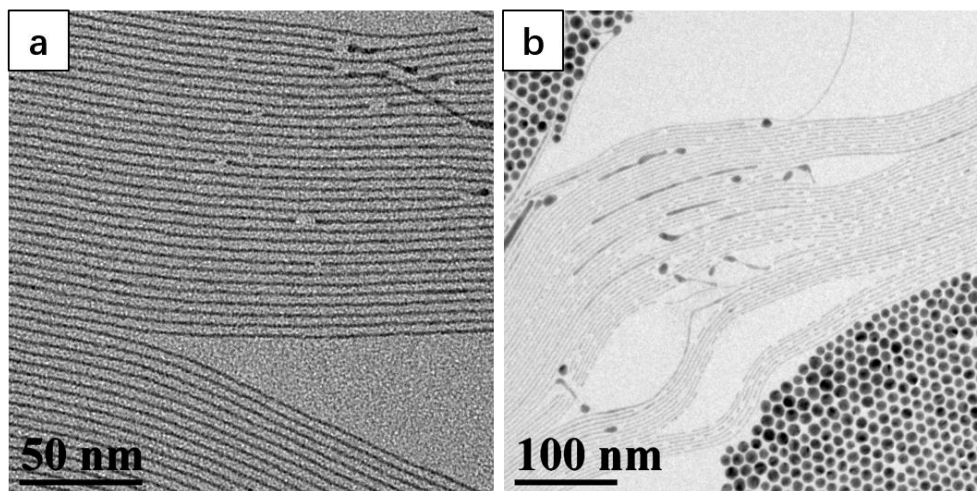

**Figure S3.** TEM images of (a) Au NWs and (b) Au NWs with Au NPs produced without Cu (I).

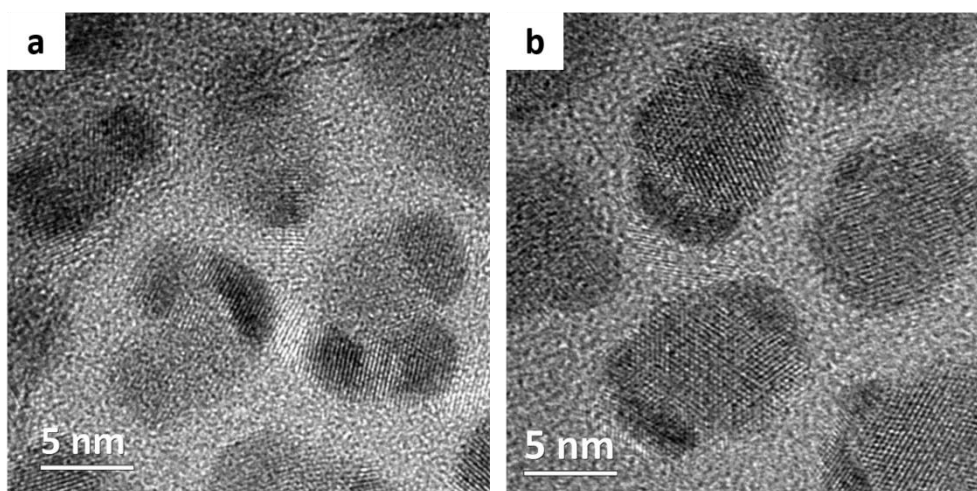

**Fig. S4.** Additional HRTEM images of NCs obtained at reaction time of 2 min.

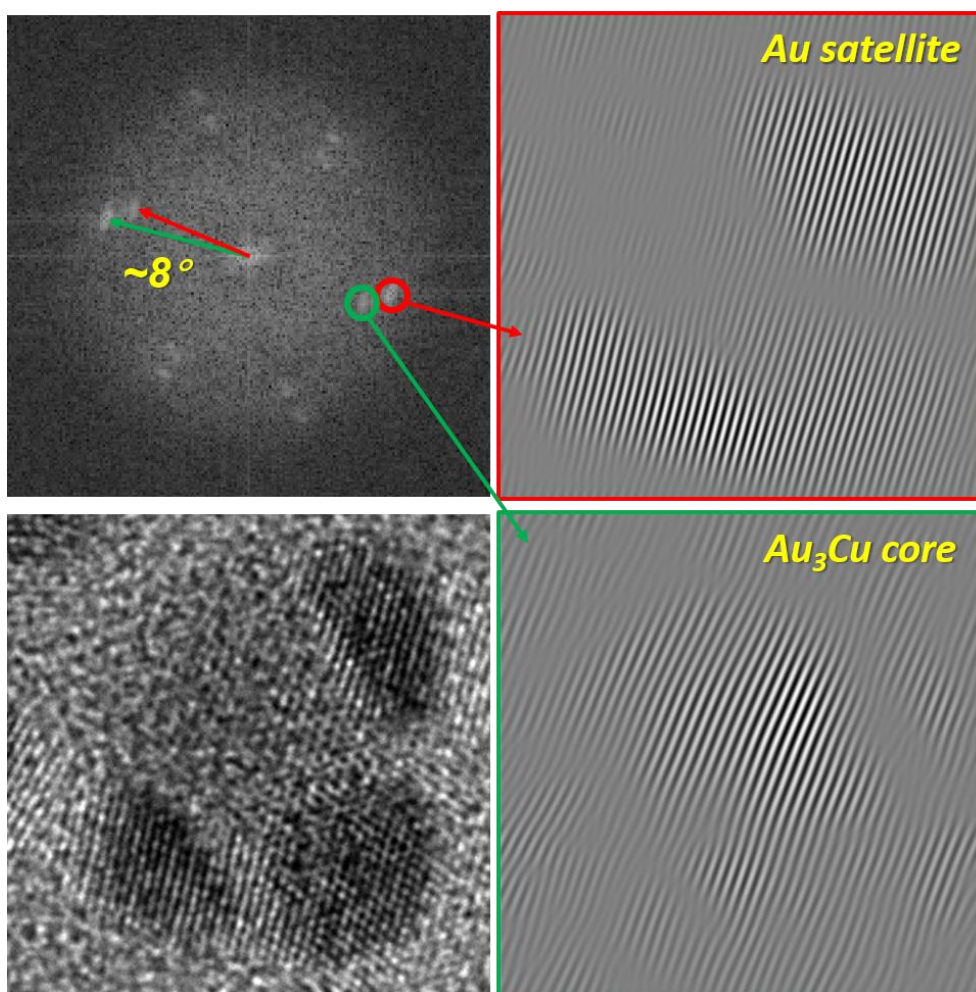

**Figure S5.** FFT filter analysis of  $\text{Au}_3\text{Cu}$ -Au heterostructure seeds. Based on the HRTEM image analysis in Figure 2a, The  $\text{Au}_3\text{Cu}$  domain has wider lattice spacing (closer green FFT spots). The FFT filter shows that all the domains have minimal lattice orientation mismatch of  $\sim 8^\circ$ , confirming the epitaxial growth proposed in Figure 2. The green and red FFT spots reflect the periodicity in the center and satellite domains, respectively.

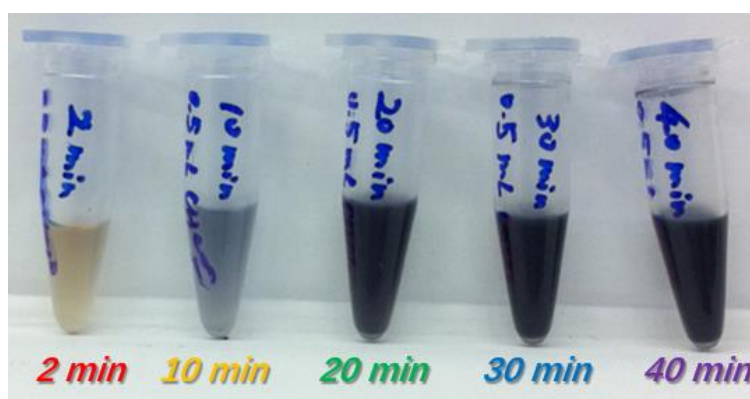

**Fig. S6.** Photograph of chloroform dispersions of particles obtained at the indicated reaction times.

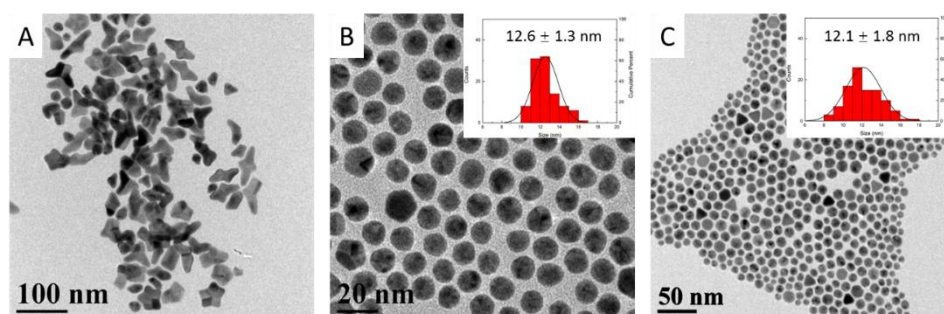

**Fig. S7.** TEM images of NCs obtained at reaction temperatures of 90 °C (a), 120 °C (b), and 150 °C (c). The insets in panels (B) and (C) show the corresponding NC size distributions.

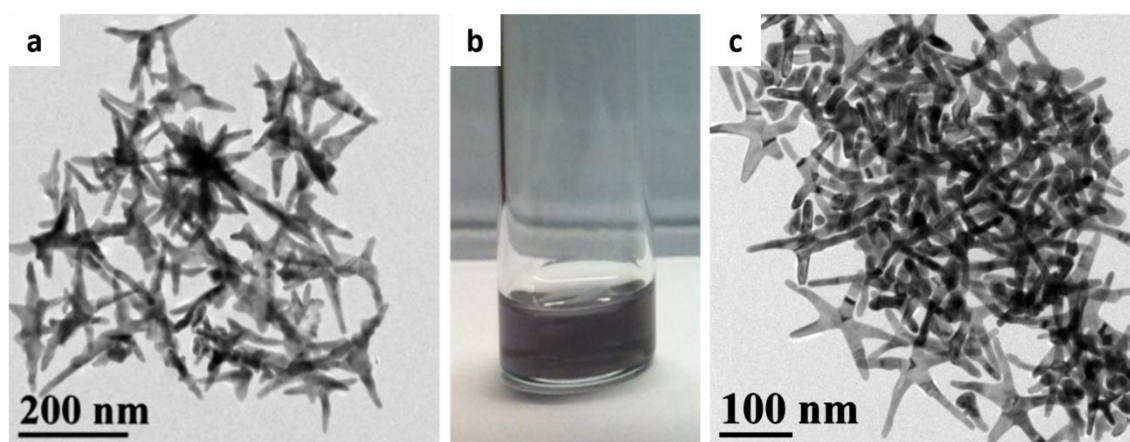

**Fig. S8.** TEM images of PEGylated multi-branched Au NPs in water (a) before and (c) after laser radiation. Panel (b) shows a typical photograph of the aqueous dispersion.



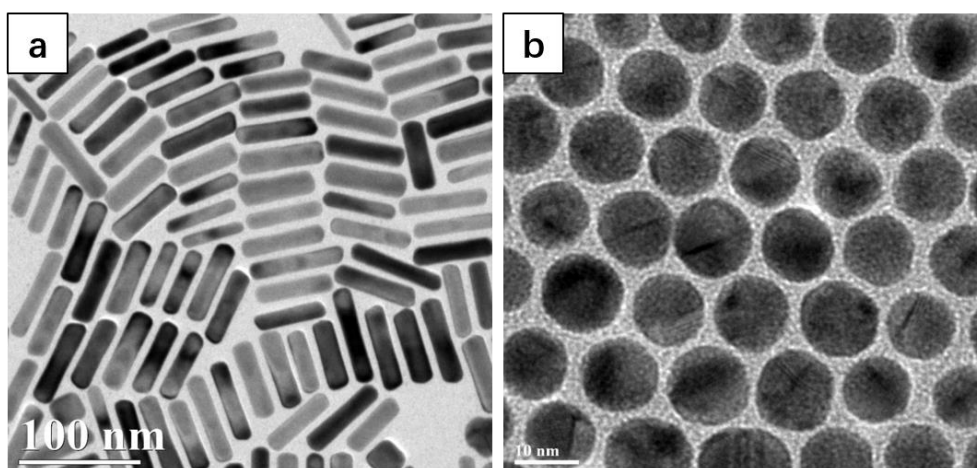

**Fig. S9.** TEM images of (a) 75×20 nm Au nanorods and (b) ~10 nm Au nanoparticles.

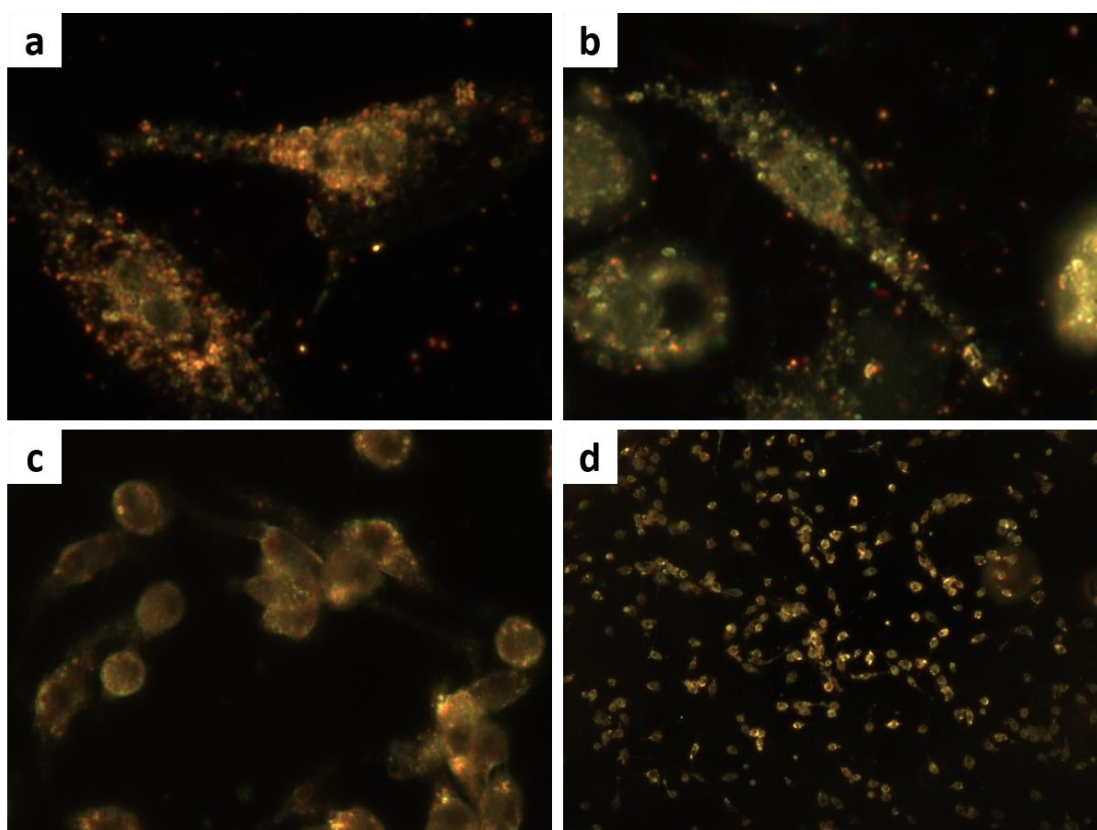

**Fig. S10.** Dark field image of multi-branched Au NPs in (a-b) HeLa and (c-d) macrophage cells.

## References

1. D. K. Roper, W. Ahn and M. Hoepfner. Microscale Heat Transfer Transduced by Surface Plasmon Resonant Gold Nanoparticles. *J. Phys. Chem. C* 2007, 111, 3636-3641.
